# Supplementary material for: Identification and functional analysis of SWEET gene family in Averrhoa carambola L. fruits during ripening
Source: PeerJ. 2021 May 31;9:e11404. doi: 10.7717/peerj.11404 (PMC8174149; doi:10.7717/peerj.11404)
Supplement: Supplemental Information 5 [file peerj-09-11404-s005.xlsx]

## Sheet: Sheet1
Supplementary file 5 The amino acid sequence similarities among the ten Carambola SWEETs
	SWEET1a	SWEET1b	SWEET2a	SWEET2b	SWEET3	SWEET11	SWEET15	SWEET16a	SWEET16b	SWEET17
SWEET1a	100	13.3333	37.4233	39.2638	36.8098	35.5828	32.5153	38.6503	31.9444	42.3313
SWEET1b	13.3333	100	31.1111	13.3333	32.2222	34.4444	33.3333	38.8889	13.8889	42.2222
SWEET2a	37.4233	31.1111	100	52.9412	29.3578	23.0769	19.8556	24.2857	23.6111	29.0179
SWEET2b	39.2638	13.3333	52.9412	100	24.0642	20.3209	21.9251	26.2032	33.3333	25.1337
SWEET3	36.8098	32.2222	29.3578	24.0642	100	33.4862	33.4862	32.1101	33.3333	35.3211
SWEET11	35.5828	34.4444	23.0769	20.3209	33.4862	100	42.4908	31.8681	36.1111	33.9286
SWEET15	32.5153	33.3333	19.8556	21.9251	33.4862	42.4908	100	29.9639	31.9444	37.9464
SWEET16a	38.6503	38.8889	24.2857	26.2032	32.1101	31.8681	29.9639	100	76.3889	52.6786
SWEET16b	31.9444	13.8889	23.6111	33.3333	33.3333	36.1111	31.9444	76.3889	100	52.7778
SWEET17	42.3313	42.2222	29.0179	25.1337	35.3211	33.9286	37.9464	52.6786	52.7778	100
