# Supplementary material for: Identification and functional analysis of SWEET gene family in Averrhoa carambola L. fruits during ripening
Source: PeerJ. 2021 May 31;9:e11404. doi: 10.7717/peerj.11404 (PMC8174149; doi:10.7717/peerj.11404)
Supplement: Supplemental Information 7 [file peerj-09-11404-s007.xlsx]

## Sheet: Sheet1
Fig.5 Expression analysis of six AcSWEET genes using qRT-PCR.						Fig. 7 Sucrose, glucose, fructose, content and titratable acidity of ‘XM’
AcSWEET1a	XM1	XM2	XM3			sucrose content	40 DAF	60 DAF	80 DAF
Relative expression-1	1	0.76	0.89			1	2.32	4.42	20.25
Relative expression-2	1	0.74	0.99			2	1.72	4.79	20.56
Relative expression-3	1	0.67	0.84			3	1.89	3.46	22.44
Average	1	0.723333	0.906667			Average	1.97667	4.22333	21.0833
AcSWEET1b	XM1	XM2	XM3			fructose content	40 DAF	60 DAF	80 DAF
Relative expression-1	1	0.52	0.52			1	10.02	27.21	29.66
Relative expression-2	1	0.66	0.42			2	10.53	23.44	29.01
Relative expression-3	1	0.63	0.49			3	12.51	25.13	32.19
Average	1	0.603333	0.476667			Average	11.02	25.26	30.2867
AcSWEET2a	XM1	XM2	XM3			glucose content	40 DAF	60 DAF	80 DAF
Relative expression-1	1	0.89	0.44			1	10.59	13.59	22.56
Relative expression-2	1	0.8	0.59			2	8.22	15.98	18.02
Relative expression-3	1	0.9	0.63			3	7.91	17.81	19.31
Average	1	0.863333	0.553333			Average	8.90667	15.7933	19.9633
AcSWEET2b	XM1	XM2	XM3			titratable acidity (TA)	40 DAF	60 DAF	80 DAF
Relative expression-1	1	0.84	0.29			1	0.89	0.33	0.22
Relative expression-2	1	0.82	0.36			2	1.24	0.56	0.25
Relative expression-3	1	0.88	0.3			3	1.04	0.51	0.18
Average	1	0.846667	0.316667			Average	1.05667	0.466667	0.216667
AcSWEET16b	XM1	XM2	XM3
Relative expression-1	1	1.38	1.29
Relative expression-2	1	1.24	0.99
Relative expression-3	1	1.3	1.16
Average	1	1.30667	1.14667
AcSWEET17	XM1	XM2	XM3
Relative expression-1	1	1.86	0.8
Relative expression-2	1	1.99	1.2
Relative expression-3	1	2.18	0.89
Average	1	2.01	0.963333
